# Supplementary material
Source: publisher figshare collection journal article supplement (https://gsapubs.figshare.com/ndownloader/files/22757048)
Supplement: Supplementary file 1 [file 22757048]

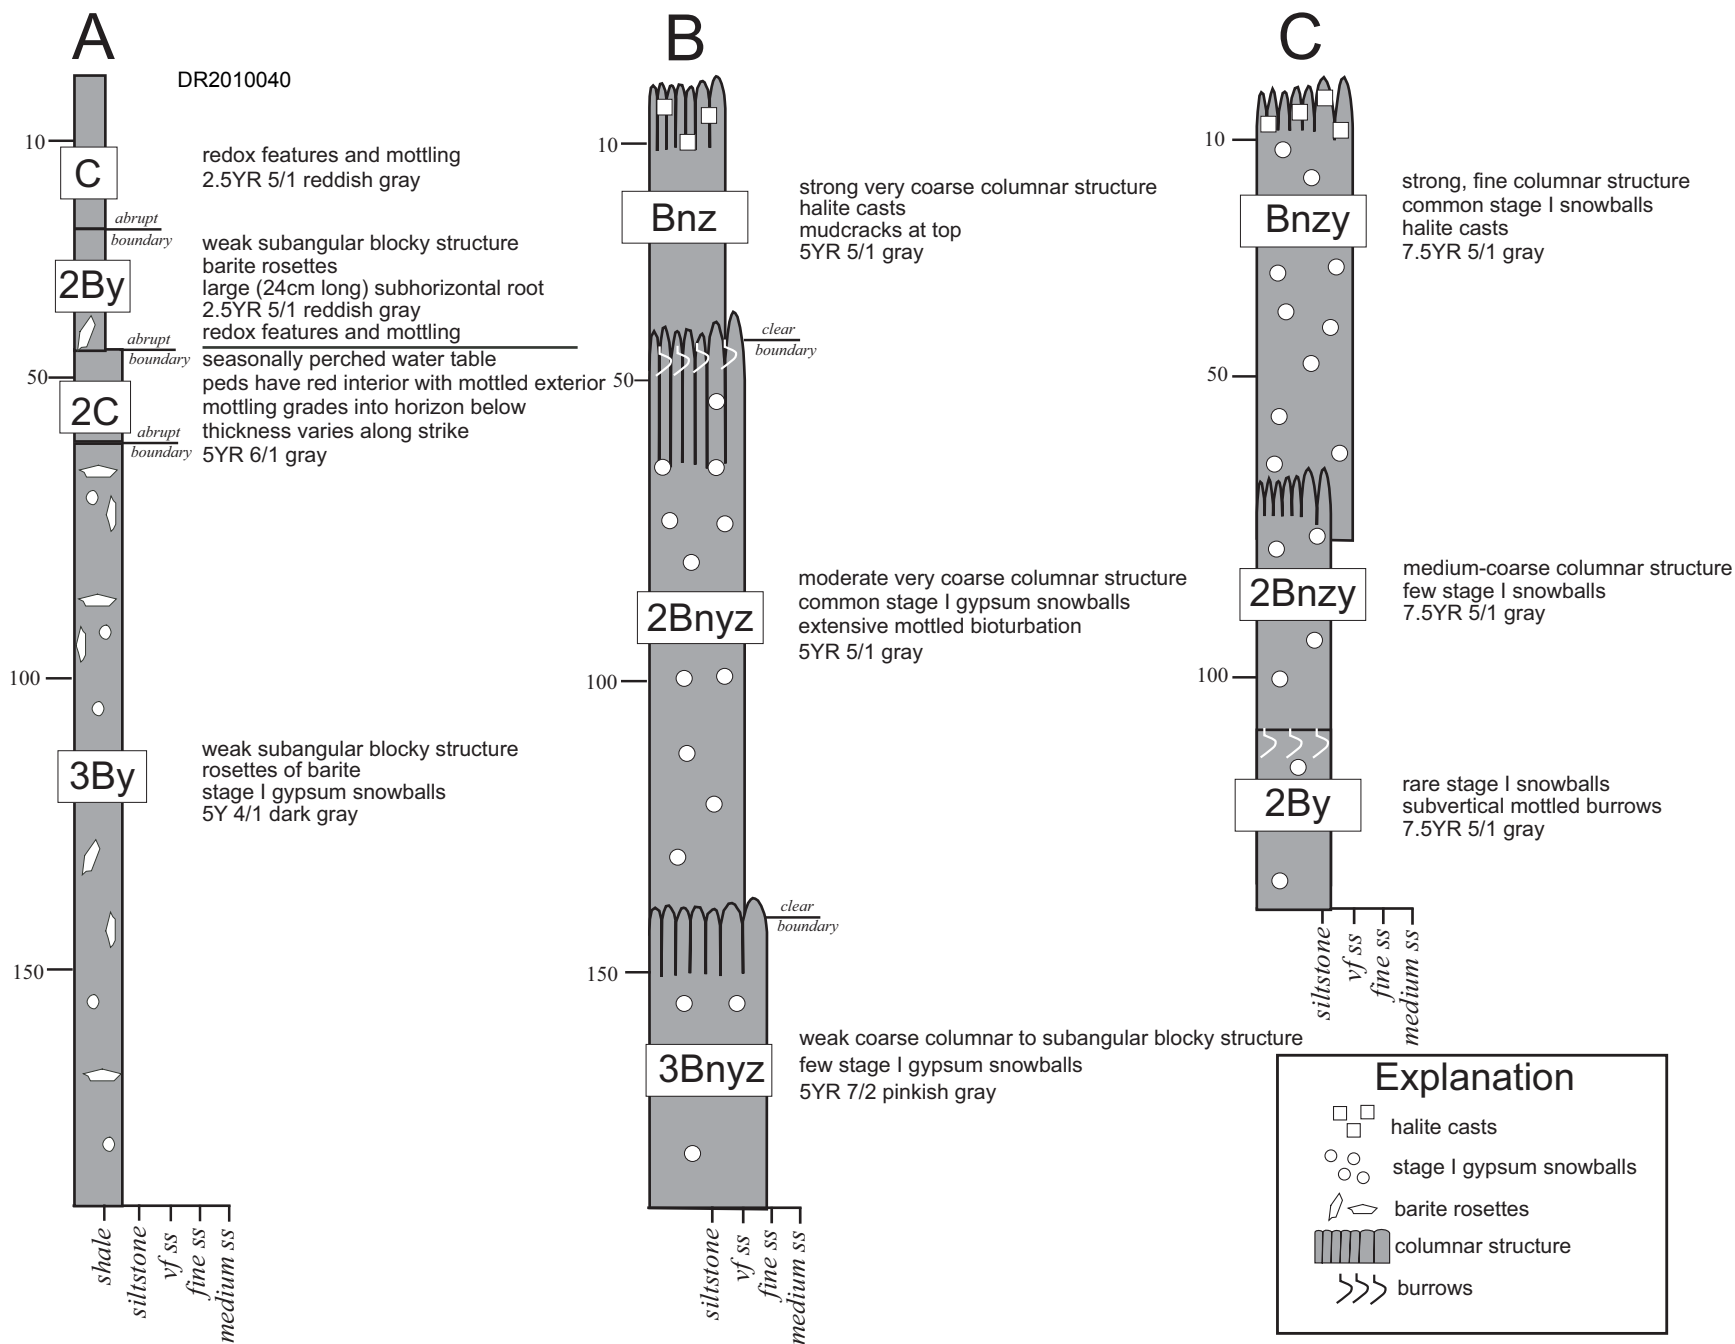

Data Repository Figure 1. Examples of some typical soil horizons present in Carroza Formation. Soil descriptions from: A) soil profile ~420 meters from base of Carroza in Arroyo Las Cabras section, B) soil profile ~220 meters from base of Carroza in Diablo Canyon section, and C) soil profile ~130m from base of Carroza in Diablo Canyon section.
